# Supplementary material
Source: PubMed Central journal article supplement (PMC6832000)

# Appendix

## Table of Contents:

|         |                         |
|---------|-------------------------|
| 2 ..... | Appendix Figure legends |
| 3 ..... | Appendix Figure S1      |
| 4 ..... | Appendix Figure S2      |

**Appendix Fig S1.** (A) Body weight in grams, (B) BAT, (C) iWAT, (D) eWAT and (E) gastrocnemius weights of floxed and GR<sup>BATKO</sup> mice, harvested in the stressed condition of the Dex suppression test (n = 5-6 animals per group). (F) Gene expression analysis of classic GR target genes (Gilz, Per1) and GR targets that have been described in the adipose tissue (Zbtb16, Fkbp5, Angptl4, Pik3r1, Pnpla2) in the BAT these mice. VE = vehicle treated mice, +Dex = mice injected with dexamethasone. Data were analyzed with Two-way ANOVA. Error bars denote SEM.

**Appendix Fig S2.** (A) Cholesterol, (B) high density lipoprotein (HDL), (C) low density lipoprotein (LDL), (D) total protein, (E) triglycerides, (F) total bile acids (TBA) and (G) non-esterified fatty acids (NEFA) in the serum of floxed and GR<sup>BATKO</sup> mice, harvested in the stressed condition of the Dex suppression test (n = 5-6 animals per group). Data were analyzed with Two-way ANOVA. Error bars denote SEM.

# Appendix Fig S1

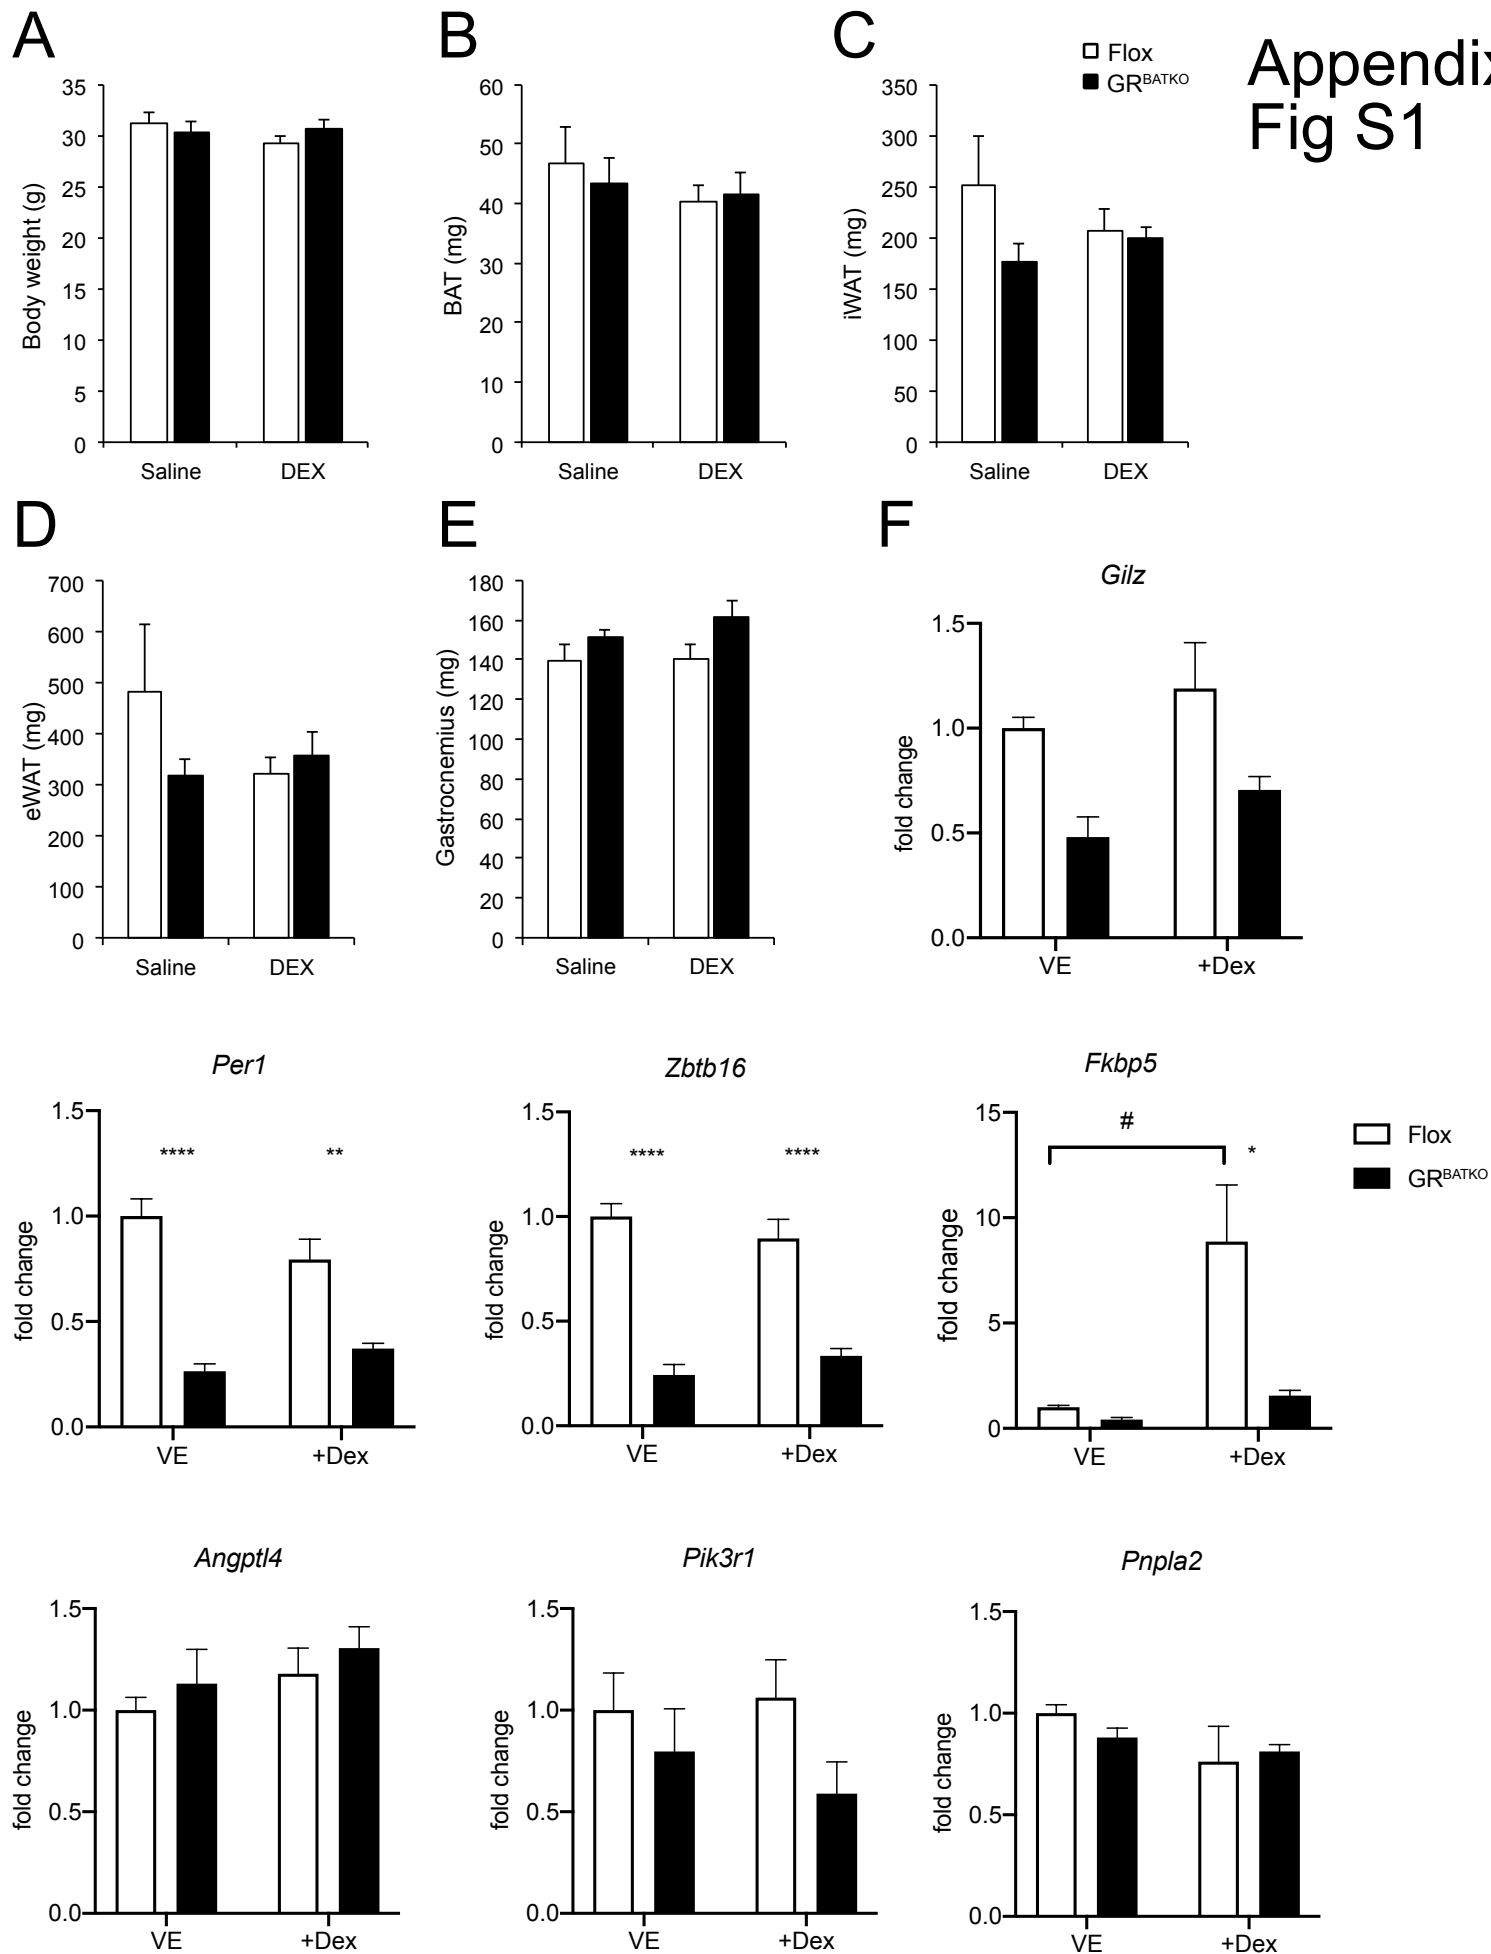

A

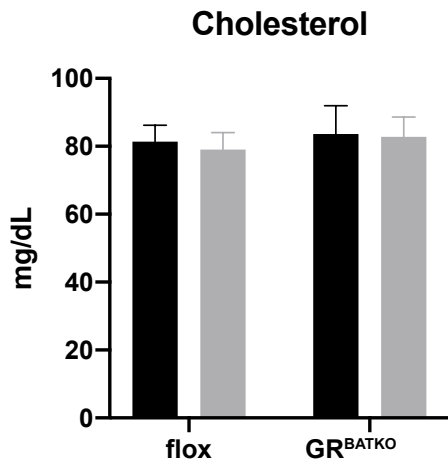

B

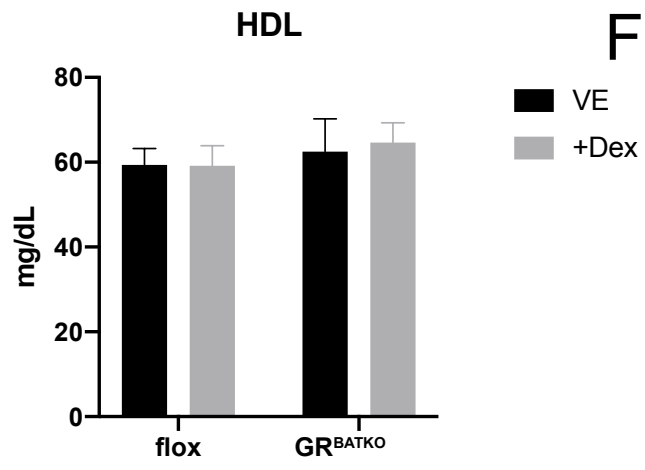

C

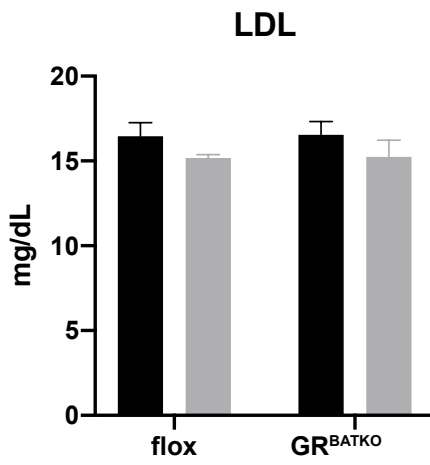

D

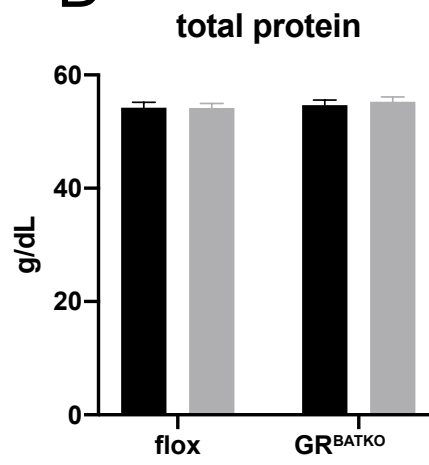

E

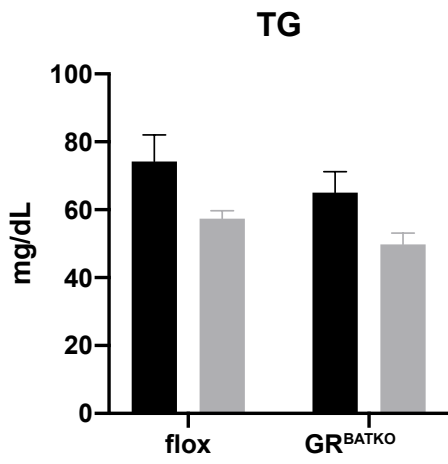

F

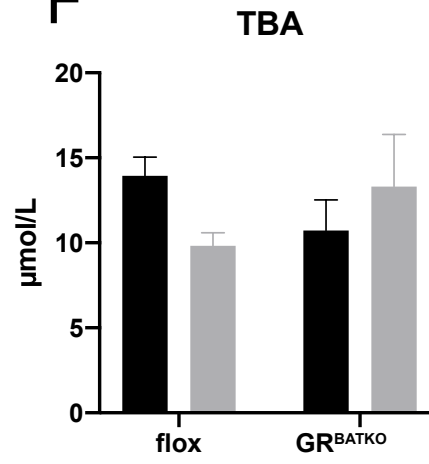

G

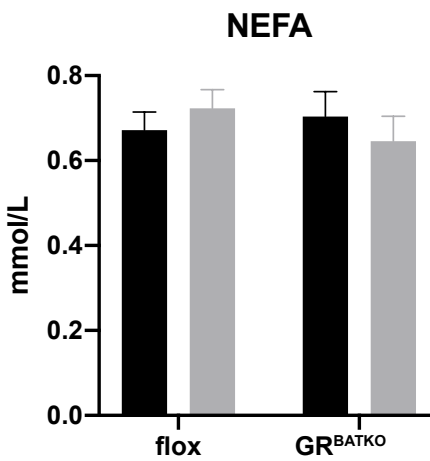

Supplement: EMBR-20-e48552-s001.pdf [file EMBR-20-e48552-s001.pdf]
