# Supplementary material
Source: PubMed Central journal article supplement (PMC6832000)
Supplement: EMBR-20-e48552-s002.pdf [file EMBR-20-e48552-s002.pdf]

## Expanded View Figures

**Figure EV1. GR<sup>BATKO</sup> BAT and iWAT are not significantly different from Flox controls under cold exposure.**

- A GR mRNA levels in BAT after 1 week of cold exposure at 5°C ( $n = 5-6$  mice per group).
- B GR expression in BAT separated into adipocytes and stromal vascular fraction ( $n = 4$  animals per group).
- C Amplification plots for GR and Nr3c2, indicating lower levels of Nr3c2 being present in BAT ( $n = 9$  animals per group).
- D Nr3c2 expression is unaffected upon knockdown of GR in BAT ( $n = 5-6$  mice per genotype).
- E Body weight loss over the 1-week cold exposure ( $n = 5-6$  animals per group).
- F Weight of white adipose depots ( $n = 5-6$  animals per group).
- G Representative images of H&E-stained sections from iWAT. Scale bar 200  $\mu\text{m}$ .
- H qRT-PCR analysis of thermogenic marker gene expression in iWAT ( $n = 5-6$  mice per group).
- I-L Blood glucose, insulin, triglycerides, and NEFA levels in Flox and GR<sup>BATKO</sup> animals after 1 week of exposure to 5°C ( $n = 6$  animals per group).

Data information: Data were analyzed with two-tailed Student's *t*-test. \*\* $P < 0.01$ . Error bars denote SEM.

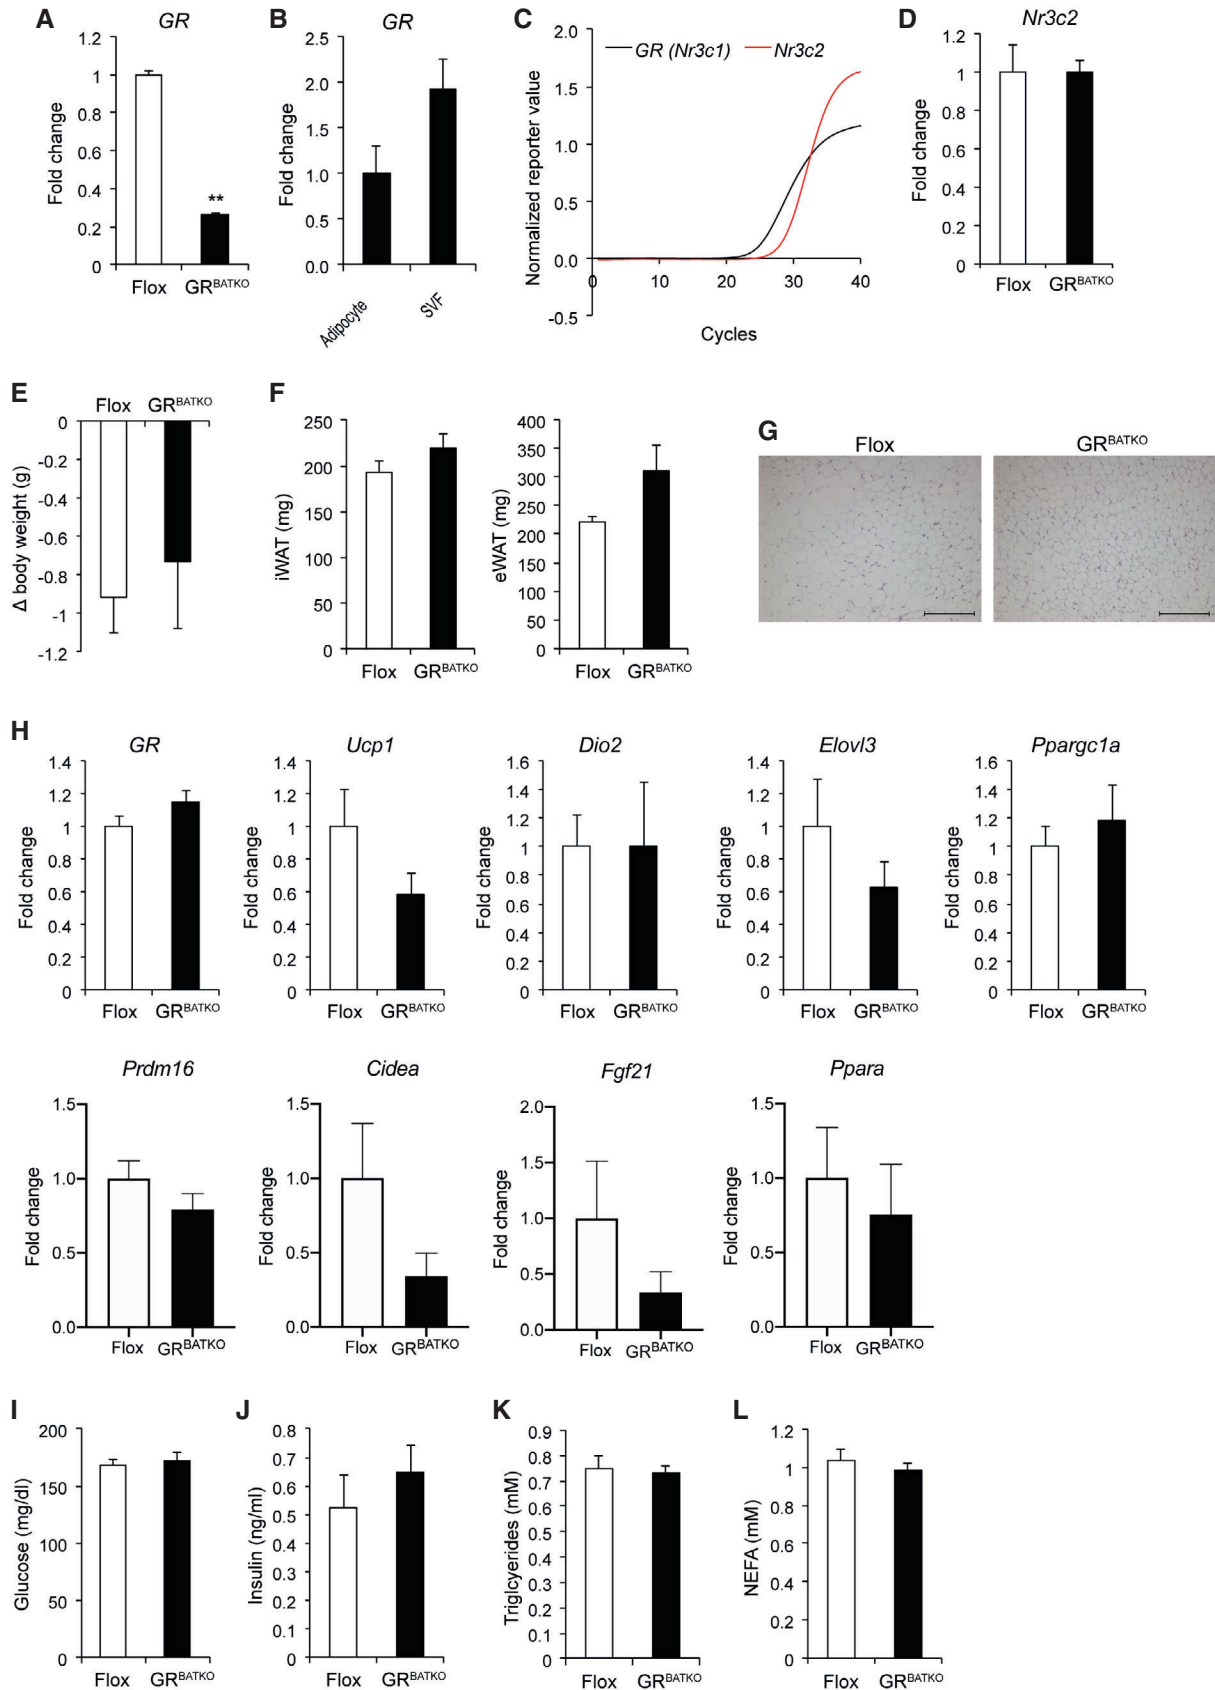

Figure EV1.

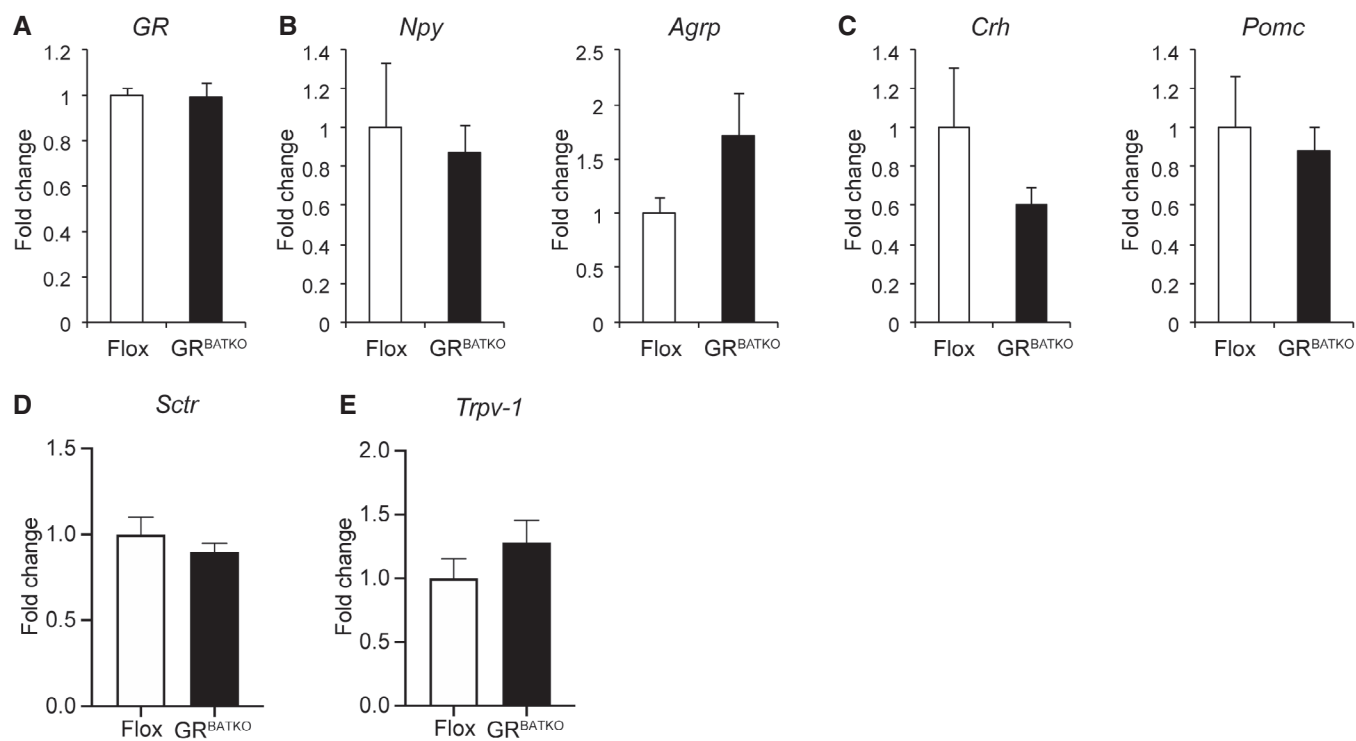

**Figure EV2. Hypothalamic gene expression signature is comparable between GR<sup>BATKO</sup> and Flox control mice.**

A GR mRNA levels in hypothalamus of Flox and GR<sup>BATKO</sup> animals after 24 weeks of high-fat feeding ( $n = 5-9$  samples per group).

B qRT-PCR analysis of orexigenic markers *Npy* and *Agrp* ( $n = 5-9$  animals per group).

C *Crh* and *Pomc* mRNA levels in hypothalamus of Flox and GR<sup>BATKO</sup> mice determined by qRT-PCR ( $n = 5-9$  animals per group).

D *Sctr* mRNA levels in BAT of Flox and GR<sup>BATKO</sup> mice determined by qRT-PCR ( $n = 9-11$  animals per group).

E *Trpv-1* mRNA levels in BAT of Flox and GR<sup>BATKO</sup> mice determined by qRT-PCR ( $n = 5-9$  animals per group).

Data information: Error bars represent SEM.

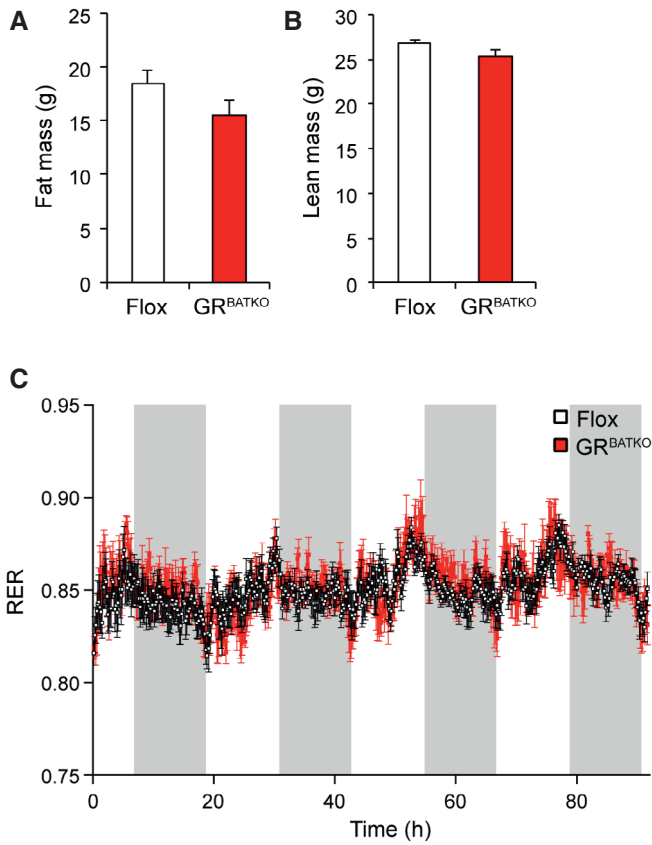

**Figure EV3. GR knockdown in BAT does not significantly change body composition or respiratory exchange ratio.**

A Fat mass measured with echoMRI in conscious Flox and GR<sup>BATKO</sup> mice ( $n = 6-8$  animals per group).  
 B Lean mass in Flox and GR<sup>BATKO</sup> mice after indirect calorimetry ( $n = 6-8$  animals per genotype).  
 C Respiratory exchange ratio (RER) in Flox and GR<sup>BATKO</sup> mice measured over a 90-h period ( $n = 6-8$  animals per genotype).

Data information: Error bars represent SEM.

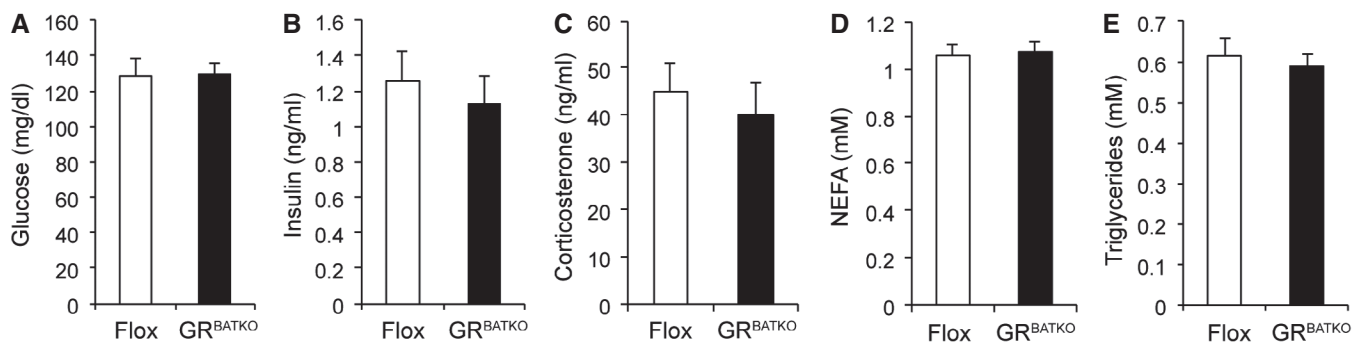

**Figure EV4. GR<sup>BATKO</sup> react comparably to Flox controls to an overnight fast.**

A-E Plasma metabolites in Flox and GR<sup>BATKO</sup> mice fed HFD for 16 weeks. Blood collected after an overnight fast ( $n = 13-14$  mice per group). Error bars represent SEM.

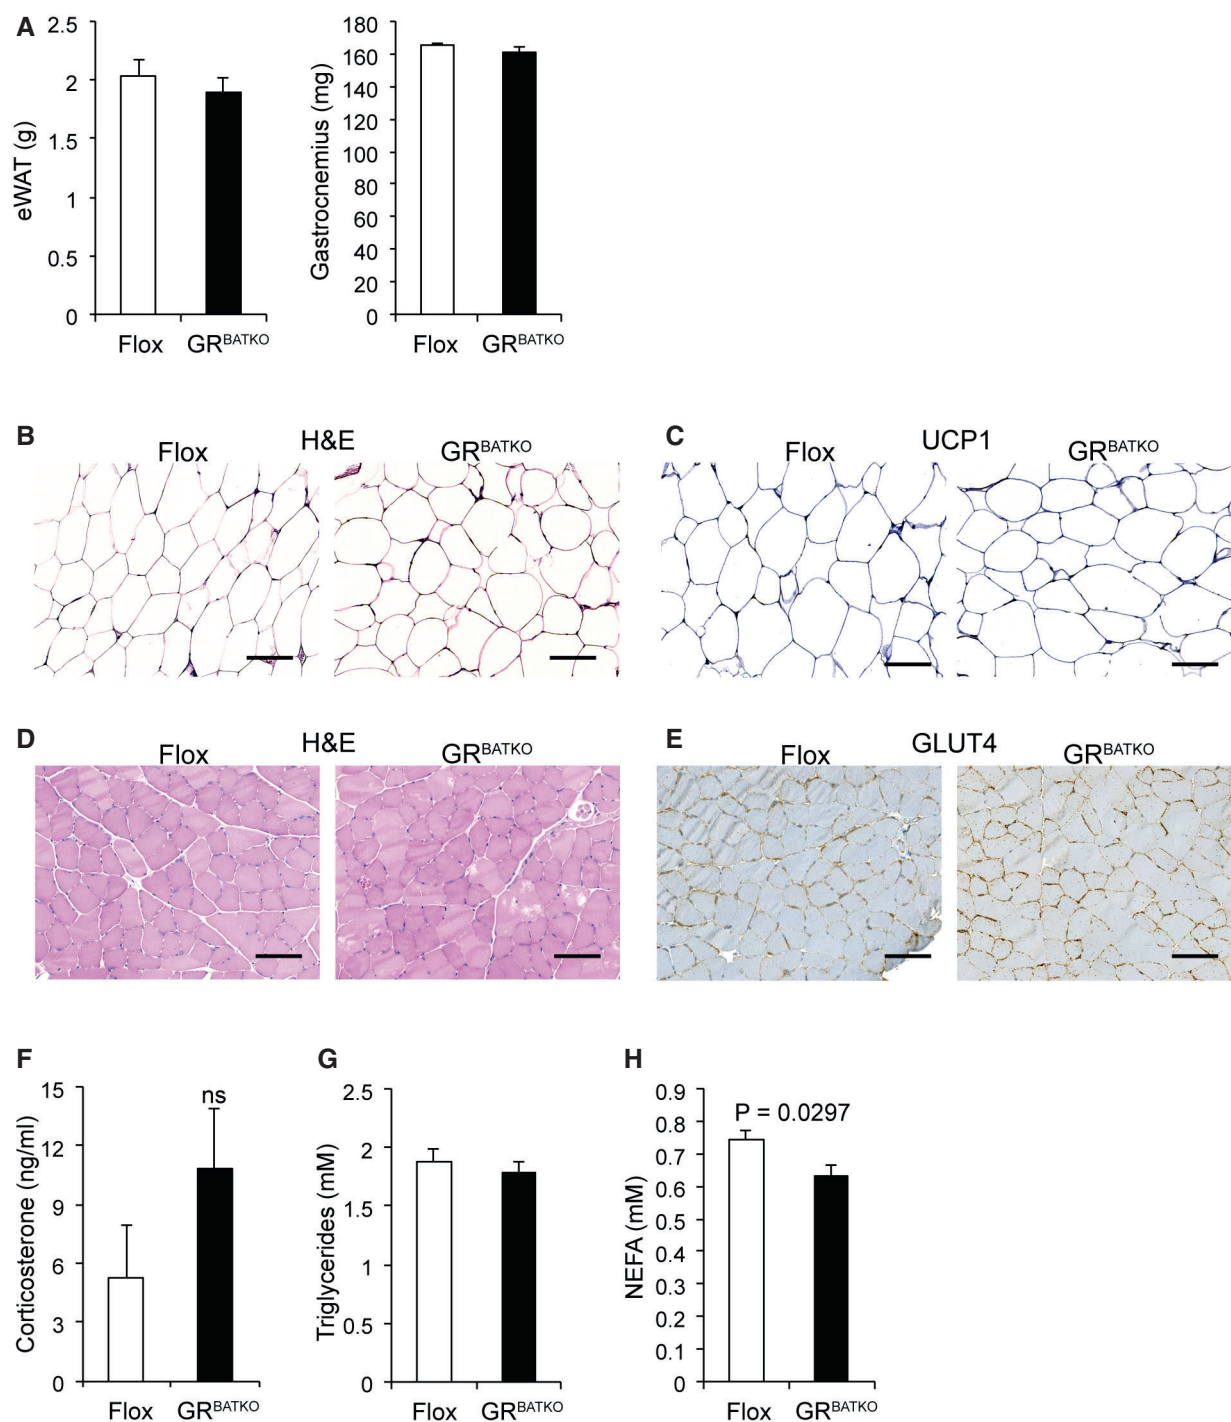

**Figure EV5. Tissue weight, morphology, and metabolic parameters on HFD do not differ between GR<sup>BATKO</sup> mice and Flox controls.**

A eWAT and gastrocnemius tissue weights of Flox and GR<sup>BATKO</sup> mice fed a HFD for 24 weeks ( $n = 4-6$  mice per group).  
 B Representative H&E staining of iWAT from Flox and GR<sup>BATKO</sup> mice fed a HFD for 24 weeks ( $n = 10-13$  mice per group). Scale bar 100  $\mu$ m.  
 C Representative immunohistochemistry for UCP1 in BAT ( $n = 10-13$  mice per group). Scale bar 100  $\mu$ m.  
 D Representative H&E staining of gastrocnemius muscle from Flox and GR<sup>BATKO</sup> mice fed HFD for 24 weeks ( $n = 10-13$  mice per group). Scale bar 100  $\mu$ m.  
 E Representative immunohistochemistry for GLUT4 in gastrocnemius muscle ( $n = 10-13$  mice per group). Scale bar 100  $\mu$ m.  
 F-H Serum corticosterone, triglyceride, and NEFA levels in Flox and GR<sup>BATKO</sup> animals at the end of the HFD study ( $n = 10-13$  animals per group).

Data information: Data were analyzed with two-tailed Student's *t*-test. Error bars represent SEM.
